## **Protocol for a scoping review of literature on digital sexual, reproductive, and gender health care for LGBTQI+ youth**

Julie McLeod<sup>1</sup>, Paul Flowers<sup>2</sup>, Jo Gibbs<sup>3</sup>, Claudia S. Estcourt<sup>1</sup>, Jennifer MacDonald<sup>1</sup>

<sup>1</sup>Department of Nursing and Community Health, Glasgow Caledonian University

<sup>2</sup>School of Psychological Sciences and Health, University of Strathclyde

<sup>3</sup>Department of Infection and Population Health, University College London

### **Author Note**

Julie McLeod <https://orcid.org/0000-0001-6787-1511>

Paul Flowers <https://orcid.org/0000-0001-6239-5616>

Jo Gibbs <https://orcid.org/0000-0001-5696-0260>

Claudia S. Estcourt <https://orcid.org/0000-0001-5523-5630>

Jennifer MacDonald <https://orcid.org/0000-0002-3896-0846>

We have no conflict of interest to disclose.

Correspondence concerning this protocol should be addressed to Julie McLeod, Glasgow Caledonian University, M436 George Moore Building, Cowcaddens Road, Glasgow,

G4 0BA. Email: [julie.mcleod@gcu.ac.uk](mailto:julie.mcleod@gcu.ac.uk)

NOTE: This preprint reports new research that has not been certified by peer review and should not be used to guide clinical practice.

## Abstract

**Introduction:** Lesbian, gay, bisexual, trans, queer, questioning, and other sexual and gender minority (LGBTQI+) youth are diverse populations who experience poor sexual health outcomes (e.g., high rates of sexually transmitted infections (STIs) and human immunodeficiency virus (HIV), unplanned pregnancy, and sexual violence) and multiple barriers to sexual and reproductive health care (SRHC) and gender health care (GHC). In high-income, developed countries, barriers include confidentiality concerns; stigma and discrimination; and health care providers' lack of specific training. Digital SRHC and GHC have the potential to overcome key barriers for LGBTQI+ youth by offering anonymous and independent access to care. However, the literature on digital SRHC and GHC for LGBTQI+ youth is fragmented, often focussing on one sub-population at a time, despite shared barriers. The extent and nature of recent literature regarding digital SRHC and GHC for LGBTQI+ youth is unclear, as is acceptability of, and barriers/facilitators to, LGBTQI+ youth engaging with digital SRHC and GHC.

**Objective:** To identify, describe, and evaluate the methodological quality of, the existing literature on digital SRHC and GHC for LGBTQI+ youth in high-income, developed countries, synthesise study findings, and make recommendations for future research.

**Inclusion criteria:** Research studies from 2018 onward in published and grey literature on any aspect of digital (e.g., websites, mobile applications) SRHC and GHC (e.g., online information, support and advice, and clinical care for STIs and HIV, fertility, sexual violence, sexual wellbeing, and gender expression and transition) for LGBTQI+ youth (aged 10-35 years) in high-income, developed countries.

**Method:** This study will follow the Joanna-Briggs Institute (JBI) methodology for scoping reviews. The databases to be searched include APA PsycInfo (ProQuest); APA PsycArticles (ProQuest); CINAHL Complete (EBSCO); MEDLINE (EBSCO); ERIC (EBSCO); British Education Index (EBSCO); Education Database (ProQuest); Computer Science Database (ProQuest); and Web of Science. Grey literature will be identified using Google Scholar. Studies will be screened against and selected for inclusion in line with the eligibility criteria. Key data from included studies will be extracted to a structured spreadsheet, adapted from the JBI extraction tool, then synthesised qualitatively using the JBI meta-aggregative approach for a systematic narrative account, accompanied by tables as appropriate.

*Keywords:* young people; sexual and gender minority; gender affirming care; eHealth; sexual health

## Introduction

### The problem

Lesbian, gay, bisexual, trans, queer, questioning, intersex and other sexual orientation and gender diverse and minority (LGBTQI+) (Stonewall, n.d.; YoungScot, 2022) youth (broadly aged 10-35, as ‘youth’ is categorised in various age ranges across research, ranging from 10 to 34 years: e.g., Decker et al., 2021; Step et al., 2022) are heterogenous and marginalised populations facing to two key issues regarding sexual and reproductive health (SRH) and gender health (GH): 1) poor SRH and GH outcomes; and 2) barriers to sexual and reproductive health care (SRHC) and gender health care (GHC). See Tables 1 and 2 for an overview of abbreviations and key terms.

Firstly, compared to their heterosexual, cisgender and adult counterparts, LGBTQI+ youth are at disproportionately high risk for acquiring sexually transmitted infections (STIs) and human immunodeficiency virus (HIV), particularly young gay, bisexual and other men who have sex with men (GBMSM) and trans women (Quinn et al., 2021; Reisner et al., 2019; UKHSA, 2022; Day et al., 2021; Epps et al., 2023). Additionally, LGBTQI+ youth disproportionately experience early and unplanned pregnancy, and sexual abuse and violence, particularly young bisexual women and trans youth (Wood et al., 2016; Ybarra et al., 2022; Quinn et al., 2021; Reisner et al., 2019; UKHSA, 2022; Day et al., 2021; Epps et al., 2023; Atteberry-Ash et al., 2020; Semprevivo et al., 2021; Saewyc, 2014; Tornello et al., 2014; Ela & Budnick, 2017; Eisenberg et al., 2020). Moreover, compared with heterosexual youth, LGBTQI+ youth are more likely to be sexually active, have earlier sexual debut (before age 13) and have four or more sexual partners, and are less likely use condoms (Wood et al., 2016; Arrington-Sanders et al., 2016). Alongside poor SRH outcomes, LGBTQI+ youth can experience gender dysphoria (emotional distress due to incongruence between gender and sex) and related anxiety and depression, and are at high risk of self-harm and suicidal behaviours

(Tan et al., 2022; Sood et al., 2021). LGBTQI+ youth have been found to experience higher levels of anxiety, depression, and discomfort with their gender identity based on societal norms and expectations than LGBTQI+ adults (Jackman, 2018).

Secondly, LGBTQI+ youth experience barriers to engaging with SRHC and GHC and often have low help-seeking behaviour (Phillips et al., 2019; Sharma et al., 2019; Boydell et al., 2017; Hibbert et al., 2020; Newcomb et al., 2020; Wood et al., 2016). Barriers include confidentiality concerns; perception and experience of discrimination, marginalisation and stigma; health care providers' (HCPs) lack of knowledge and training about their needs; and heteronormative assumptions of their gender and sexuality (Hudson-Sharp & Metcalf, 2016; Fisher et al., 2018; Boydell et al., 2017; Lefkowitz & Mannell, 2017; Mkhize & Maharaj, 2020; Logie et al., 2019; Quinn et al., 2019; Knight et al., 2014). For GHC specifically, a key barrier is also long wait times of months to years (Puckett et al., 2018; Scheim et al., 2021; Wright et al., 2021). Long wait times can lead to LGBTQI+ youth self-administering hormones acquired from the internet, friends, family, and strangers, without medical consultation, to undergo physical transition to align their body with their gender identity (Mepham et al., 2014; Rotondi et al., 2013; Kennedy et al., 2021). Self-administering hormones is problematic as it is associated with less awareness of side effects than obtaining hormones from a physician and severe medical complications, such as cardiovascular disease or cancer (Mepham et al., 2014; Metastasio et al., 2018).

It is important to consider SRH and GH together, as research indicates that GH is a critical issue relating to SRH. Gender dysphoria can negatively impact LGBTQI+ people's sexual behaviour and expression, due to discomfort with their genitals, such as never allowing sex partners to touch their genitals or breasts (Gil-Llario et al., 2021). Further, receiving GHC can positively impact all types of sexual experiences and activities among trans people (Bungener et al., 2020) Additionally, trans people who have received GHC are more likely than

those who have not to have sex and to do so more often (Nikkelen & Kreules, 2018). Gender affirmation is also associated with increased STI testing and awareness of the HIV prevention drug, pre-exposure prophylaxis (PrEP) (Andrzejewski et al., 2021). However, little is known about the relationship between SRH and GH among LGBTQI+ youth, as much of the research has focussed on adult populations (e.g., Gil-Lario et al., 2021; Bungener et al., 2020; Nikkelen & Kreules, 2018; Andrzejewski et al., 2021).

It is also essential to consider the intersectionality of gender and sexual orientation with other socio-economic demographics, such as ethnicity, occupation and education, as these intersecting demographics can be associated with increased risk of poor outcomes and barriers to engaging with health care (O'Neill et al., 2014; Ng, 2016). For example, in the United Kingdom (UK) and United States (US), Black populations are disproportionately affected by STIs and HIV (UKHSA, 2022; Hightow-Weidman et al., 2012; Jones, 2020). Additionally, intersectional stigma experienced by young LGBTQI+ people of colour in the US and Canada can impact identity disclosure to HCPs and decisions about uptake of PrEP (Quinn et al., 2019; Shanshan, 2014).

### **A potential solution**

Digital SRHC and GHC, of which there has been a rapid expansion in recent years (Norman et al., 2022; Ong et al., 2022; Tucker et al., 2022; Robinson & Johnston, 2018; Yousaf & Currie, 2021; Lunt et al., 2021), offers care that is private, self-managed, and convenient, overcoming key barriers to accessing health care for LGBTQI+ youth (Magee et al., 2012; Mustanski et al., 2015; Stephenson et al., 2020; Refugio et al., 2019; Bauermeister et al., 2022; DeHaan et al., 2013). An initial literature search indicates that digital SRHC and GHC includes: 1) *information* delivered online on websites (e.g., World Health Organisation [WHO], 2022; Magee et al., 2012) or through online education programmes (e.g., Mustanski et al., 2015; Lacombe-Duncan et al., 2021); 2) *advice and support* online which may involve use of

telecommunication such as video calls, live chats, email, or text services with charity or community-based organisation staff or peers (e.g., Radix et al., 2022; Skeen & Cain, 2022); and 3) *clinical care* provided online, such as STI/HIV self-sampling kits and test results (e.g., Bauermeister et al., 2015; Estcourt et al., 2017; Hottes et al., 2012; Ling et al., 2010; Brugha et al., 2011); PrEP (ePrEP; Kincaid et al., 2021); partner notification (PN) and testing options (e.g., Golden et al., 2022; Flowers et al., 2021; Mimiaga et al., 2008); and consultations (eConsult) and telemedicine (e.g., Sequeira et al., 2021; Lucas et al., 2023).

Digital SRHC and GHC have been found to be preferable to in-person services among LGBTQI+ youth (Cherenack et al., 2016; Flanders et al., 2017; Gilbert et al., 2013) and LGBTQI+ youth often turn to the internet for SRH information to compensate for lack of formal education or a trusted person to ask (DeHaan et al., 2013; Mitchell et al., 2014; Bradford et al., 2019). Thus, it is important to understand the barriers and facilitators to digital SRHC and GHC among LGBTQI+ youth in order to determine how to best to deliver SRHC and GHC for LGBTQI+ youth. However, the extent of existing digital SRHC and GHC *for LGBTQI+ youth* is unclear, as the research does not often focus specifically on LGBTQI+ youth, but rather general populations (e.g., Bailey et al., 2015; Guse et al., 2012; Maloney et al., 2020; Ortiz-Martínez & Ríos-González, 2017). Additionally, digital SRHC and GHC interventions for LGBTQI+ youth typically target specific sub-populations such as young GBMSM (e.g., Lelutiu-Weinberger et al., 2015) or transgender youth (e.g., Sequeira et al., 2020). As a result, the literature is fragmented, despite research indicating that LGBTQI+ youth face similar barriers to engaging with digital SRHC and GHC, for example: privacy concerns; lack of privacy at the time of engagement; the cognitive burden of finding, understanding, and interpreting information alone; low SRH literacy; and inequalities in access and skills to use and understand digital technology (Ybarra et al., 2020; Cherenack et al., 2016; Ventuneac et al., 2020; Epps et al., 2023; Robinson et al., 2020). Therefore, a review is needed to outline the

scope of digital SRHC and GHC for LGBTQI+ youth, and their acceptability of, and barriers and facilitators to, their use. This scoping review seeks to fill this gap and identify knowledge to form the foundation of understanding how to optimise SRHC and GHC for LGBTQI+ youth.

An important consideration is that barriers to SRHC and GHC (digital and non-digital) differ considerably between countries, depending on access to the internet and digital technology (Robinson et al., 2020), as well as infrastructure and social welfare/protections for access to health care (Germain et al., 2015; Gottlieb et al., 2014). Thus, this scoping review will focus on high-income, developed countries, such as the UK, Canada and Australia, for maximum generalisability of the findings. A systematic scoping review approach (e.g., Peters et al., 2015) was adopted as this was the most appropriate method to enable a mapping of the literature to examine the type and range of research activity and to identify gaps in the literature regarding digital SRHC and GHC for LGBTQI+ youth (Peters et al., 2020; Arksey & O'Malley, 2005).

A preliminary search of MEDLINE, the Cochrane Database of Systematic Reviews, Joanna-Briggs Institute (JBI) Evidence Synthesis, and British Medical Journal (BMJ) Open using the words “LGBT youth sexual health”, “LGBT youth STI”, and “LGBT youth STD” was conducted (31.01.2023) and no published or ongoing systematic or scoping reviews on the topic were identified. However, three similar reviews were identified during the literature search (Gilbey et al., 2020; Cui et al., 2022; and Stoehr et al., 2022). See Appendix A for an overview of how this current study differs from these three studies.

### **Review objective**

The objective of this scoping review is to identify, describe, and evaluate the methodological quality of, the existing literature on digital SRHC and GHC for LGBTQI+ youth in high-income, developed countries, synthesise study findings, and make recommendations for future research.

## Review questions (RQs)

- RQ1: What dimensions of digital SRHC and GHC for LGBTQI+ youth in high-income, developed countries have received attention in the literature and who are the target populations?
- RQ2: What are the characteristics of LGBTQI+ youth in research regarding digital SRHC and GHC and accessing and using digital SRHC and GHC in high-income, developed countries?
- RQ3: What is the acceptability of digital SRHC and GHC in high-income, developed countries for LGBTQI+ youth?
- RQ4: What are the barriers and facilitators to LGBTQI+ youth accessing and using digital SRHC and GHC in high-income, developed countries?
- RQ5: How is LGBTQI+ ‘youth’ defined in digital SRHC and GHC research from high-income, developed countries?
- RQ6: How, if at all, have theory or frameworks been used in research into digital SRHC and GHC for LGBTQI+ youth in high-income, developed countries?

## Table 1

*Acronyms used throughout this protocol and their definitions*

| Acronym | Definition                                                                                                                                  |
|---------|---------------------------------------------------------------------------------------------------------------------------------------------|
| GBMSM   | Gay, bisexual, and other men who have sex with men                                                                                          |
| GH      | Gender health                                                                                                                               |
| GHC     | Gender health care                                                                                                                          |
| HCP     | Health care provider                                                                                                                        |
| HIV     | Human immunodeficiency virus                                                                                                                |
| LGBTQI+ | Lesbian, gay, bisexual, transgender, queer, questioning, intersex, and other sexual orientation and gender diverse and minority populations |
| PrEP    | Pre-exposure prophylaxis                                                                                                                    |
| SRH     | Sexual and reproductive health                                                                                                              |
| SRHC    | Sexual and reproductive health care                                                                                                         |
| STI     | Sexually transmitted infection (e.g., chlamydia, gonorrhoea, syphilis)                                                                      |
| UN      | United Nations                                                                                                                              |
| WHO     | World Health Organisation                                                                                                                   |



**Table 2**

*Glossary of terms used within this protocol, their definitions, and references*

| <b>Term</b>                             | <b>Definition</b>                                                                                                                                                                                                                                                                                                                                     | <b>References</b>                                                                                                                                       |
|-----------------------------------------|-------------------------------------------------------------------------------------------------------------------------------------------------------------------------------------------------------------------------------------------------------------------------------------------------------------------------------------------------------|---------------------------------------------------------------------------------------------------------------------------------------------------------|
| Cisgender                               | Those whose gender identity aligns with their sex assigned at birth.                                                                                                                                                                                                                                                                                  | (Stonewall, n.d.; YoungScot, 2022)                                                                                                                      |
| Gender                                  | The socially constructed, not biologically determined, norms and roles associated with masculinity and femininity (e.g., wearing specific clothes).                                                                                                                                                                                                   | (Garofalo & Garvin et al., 2020)                                                                                                                        |
| Gender affirmation                      | A social/appearance and/or physical/medical transition to align one's gender expression and body with their gender identity.                                                                                                                                                                                                                          | (Diamond, 2020; Garofalo & Garvin et al., 2020)                                                                                                         |
| Gender diverse and minority populations | Those whose gender identify and expression do not conform to societal norms associated with their birth-assigned sex including but not limited to transgender, intersex, non-binary, gender neutral, gender fluid, gender non-conforming.                                                                                                             | (Stonewall, n.d.; YoungScot, 2022)                                                                                                                      |
| Gender dysphoria                        | Emotional distress due to incongruence between sex and gender identity.                                                                                                                                                                                                                                                                               | (Kuper et al., 2019)                                                                                                                                    |
| Gender expression                       | The way in which people manifest, convey and present their gender.                                                                                                                                                                                                                                                                                    | (Diamond, 2020)                                                                                                                                         |
| Gender health (GH)                      | Living in the gender that feels most authentic and comfortable, based on the premise that sex and gender are distinct. This can involve gender affirmation and transition to align one's body and gender expression with their gender identity.                                                                                                       | (Garofalo & Garvin et al., 2020)                                                                                                                        |
| Gender health care (GHC)                | Information, advice and support, and clinical care to treat gender dysphoria and/or support people in living in the gender that is most authentic and comfortable to them (e.g., mental health assessments; puberty blockers; menstrual suppression; hormone replacement therapy; fertility preservation or assistance, gender reassignment surgery). | (Lee & Rosenthal, 2023; Sterling & Garcia, 2020; Bhatt et al., 2022; Chen et al., 2016; Coleman et al., 2012; Hidalgo et al., 2013; van de Grift, 2023) |
| Gender identity                         | Internal sense of gender.                                                                                                                                                                                                                                                                                                                             | (Diamond, 2020)                                                                                                                                         |
| Heteronormative                         | The concept that heterosexuality is the preferred or normal mode of sexual orientation, assuming the gender binary (i.e., that there are only two distinct, opposite genders).                                                                                                                                                                        | (Garofalo & Garvin et al., 2020)                                                                                                                        |
| Intersex                                | Those who may have the biological attributes of both sexes or whose biological attributes do not fit with societal assumptions about what constitutes male or female.                                                                                                                                                                                 | (Stonewall, n.d.)                                                                                                                                       |
| Medical transition                      | Taking hormones (e.g., testosterone or oestrogen) and/or undergoing surgery to align one's body with their gender identity.                                                                                                                                                                                                                           | (Kuper et al., 2019; Defreyne et al., 2022; van de                                                                                                      |

|                                                     |                                                                                                                                                                                                                                                                                                                                                                                                                                                                   |                                                                                                                                                                          |
|-----------------------------------------------------|-------------------------------------------------------------------------------------------------------------------------------------------------------------------------------------------------------------------------------------------------------------------------------------------------------------------------------------------------------------------------------------------------------------------------------------------------------------------|--------------------------------------------------------------------------------------------------------------------------------------------------------------------------|
|                                                     |                                                                                                                                                                                                                                                                                                                                                                                                                                                                   | Grift, 2023; Miller et al., 2019)                                                                                                                                        |
| Partner notification (PN)                           | When sex partners are informed of their exposure to an STI or HIV.                                                                                                                                                                                                                                                                                                                                                                                                | (Ferreira et al., 2013)                                                                                                                                                  |
| Pre-exposure prophylaxis (PrEP)                     | An antiretroviral drug to reduce the risk of acquiring HIV.                                                                                                                                                                                                                                                                                                                                                                                                       | (Spinner et al., 2016)                                                                                                                                                   |
| Queer                                               | A term used by those wanting to reject specific labels of romantic orientation, sexual orientation and/or gender identity.                                                                                                                                                                                                                                                                                                                                        | (Stonewall, n.d.)                                                                                                                                                        |
| Questioning                                         | Exploring one's sexual orientation and/or gender identity.                                                                                                                                                                                                                                                                                                                                                                                                        | (Stonewall, n.d.)                                                                                                                                                        |
| Sex                                                 | Biological characteristics, such as chromosomes and reproductive organs, traditionally associated with male and female; however, sex is not binary, given the significant overlap in sex characteristics between 'male' and 'female' people.                                                                                                                                                                                                                      | (Garofalo & Garvin et al., 2020)                                                                                                                                         |
| Sexual and reproductive health (SRH)                | An umbrella term for issues including the absence of illness or disease, such as STIs and HIV; pregnancy, fertility and reproductive matters; sexual safety, freedom from coercion, violence or abuse; and sexual wellbeing and the ability to express one's sexuality.                                                                                                                                                                                           | (WHO, 2006; Naidoo & Wills, 2016; Mitchell et al., 2021)                                                                                                                 |
| Sexual and reproductive health care (SRHC)          | Information, advice and support, and clinical care for: 1) STI and HIV prevention, testing, and treatment; 2) fertility and pregnancy prevention, preservation, assistance, and termination; 3) sexual safety, abuse and violence; and 4) sexual wellbeing (e.g., STI/HIV testing; PrEP; PN; human papillomavirus (HPV) vaccination; contraception; in vitro fertilization (IVF); intrauterine insemination (IUI); medication to prevent pregnancy; counselling). | (Marcell et al., 2017; Hall et al., 2020; Pérez et al., 2023; Rich & Domar, 2016; Martin et al., 2007; Monester et al., 2019; Zaneva et al., 2022; Gruskin et al., 2019) |
| Sexual orientation diverse and minority populations | Those whose attraction to others is non-heterosexual including, but not limited to, lesbian, gay, bisexual, pansexual, queer, questioning.                                                                                                                                                                                                                                                                                                                        | (Stonewall, n.d.; YoungScot, 2022)                                                                                                                                       |
| Sexual wellbeing                                    | Satisfaction with sexual relationships and functioning; comfort with sexuality; resilience and forgiveness regarding sexual experience; and sexual awareness, self-esteem, security, and respect.                                                                                                                                                                                                                                                                 | (Mitchell et al. 2021; Lorimer et al., 2019)                                                                                                                             |
| Social transition                                   | Altering one's gender expression, appearance, and other social aspects to match their gender identity, such as clothes, hair, name, pronouns.                                                                                                                                                                                                                                                                                                                     | (Diamond, 2020; Kuper et al., 2019)                                                                                                                                      |
| Telemedicine                                        | Video conferencing for conversations or counselling with a HCP.                                                                                                                                                                                                                                                                                                                                                                                                   | (Lucas et al., 2023)                                                                                                                                                     |
| Trans                                               | An umbrella term for gender diverse and minority populations.                                                                                                                                                                                                                                                                                                                                                                                                     | (Chen et al., 2016)                                                                                                                                                      |
| Youth                                               | Approximately ages 10-35 years; encompasses 'youth', 'young people', 'teens', 'adolescents', and 'young adults'.                                                                                                                                                                                                                                                                                                                                                  | (WHO, 2023; UN, n.d.a; Tanner et al., 2016)                                                                                                                              |

## Eligibility criteria

The proposed scoping review will be conducted in accordance with the JBI methodology for scoping reviews, using the participant, concept, context (PCC) framework (Peters et al., 2020).

### Participants

#### *Inclusion*

The populations of focus in this scoping review are LGBTQI+ youth.

**LGBTQI.** Studies with all LGBTQI+ gender and sexual orientation diverse and minority identifying participants will be included in this scoping review. This will be inclusive of all terms to describe sexual minorities and gender diverse populations, such as non-binary, gender non-conforming, gender fluid, and gender neutral (Stonewall, n.d.).

**Youth.** Here, ‘youth’ encompasses ‘young people’, ‘young adults’ and ‘adolescents’ and covers an age range of 10 to 35 years. There is no universal definition or standardised operationalisation of ‘youth’ or its synonyms used in research. The World Health Organisation (WHO) and United Nations (UN) define ‘youth’ as 15-24 years, ‘young people’ as 10-24 years and ‘adolescents’ as 10-19 years (WHO, 2023; UN, n.d.a). However, research into SRHC and GHC for LGBTQI+ youth employs a wider age range between 10 to 35 years (e.g., 10-20, Decker et al., 2021; 13-29, Wood et al., 2016; 16-24, Magee et al., 2012; 16-29, Flanders et al., 2017; 18-26, McRee et al., 2015; 15-34, Step et al., 2022). Additionally, ‘youth’ is categorised in various age ranges across countries’ legal and policy frameworks and research, ranging from 10 to 29 years (Perovic, 2016). Moreover, those of gender and sexuality minority populations have been found to have sex earlier than heterosexual and cisgender counterparts (Wood et al., 2016), including 10 years of age (Arrington-Sanders et al., 2016). Therefore, the age range in this scoping review is deliberately broad to understand how ‘youth’ is operationalised in digital SRHC and GHC literature.

### ***Exclusion***

Research focussing on non-LGBTQI+ populations will be excluded. Studies will also be excluded if data for LGBTQI+ participants are not/cannot be disaggregated from non-LGBTQI+ participant data. Studies with child or adult populations (aged below 10 or above 35 years), or where data from participants within the age range of 10-35 years cannot be disaggregated from child/adult populations, will also be excluded.

### **Concept**

#### ***Inclusion***

The overarching concept of interest for this scoping review is digital SRHC and GHC.

**Digital.** ‘Digital’ encompasses all internet-based and digitally mediated SRHC and GHC including, but not limited to, websites; web applications (apps); mobile apps; text messaging or short messaging service (SMS); email; and video conferencing (e.g., Holloway et al., 2014; Mustanski et al., 2015). Where studies report on both digital and non-digital SRHC and GHC and it is possible to disaggregate the digital from the non-digital data, these studies will be included. Where services offer hybrid in-person and digital options, these will be included.

**SRHC.** For this scoping review, SRHC will incorporate the provision of, or engagement with, information, advice and support, and clinical care for LGBTQI+ youth regarding SRH (e.g., STIs/HIVs, fertility/pregnancy, and sexual violence, prevention, testing, treatment and management, and sexual wellbeing). SRHC will be inclusive of studies of services and interventions. Services refer to digital SRHC designed for LGBTQI+ youth for help-seeking, such as information, telecommunication, or clinical care (e.g., online STI/HIV self-sampling kits; PN; PrEP; contraception; counselling; forums, social media groups). Interventions refer to digital strategies that have been developed to change a specific SRH related behaviour(s) or outcome(s) for LGBTQI+ youth populations, such as education

programmes (Mustanski et al., 2015), social marketing campaigns (e.g., Hickson et al., 2015), or signposting to local services (e.g., West et al., 2015) (e.g., to increase condom use, sexual health related knowledge, uptake of STI self-sampling kits) including offering a digital version of a service that is typically delivered in person (e.g., Brady et al., 2015).

**GHC.** For this scoping review, GHC will incorporate the provision of, or engagement with information, advice and support, and clinical care for LGBTQI+ youth regarding GH (e.g., gender identity, expression, affirmation, and social or physical transition). This will be inclusive of research into services and interventions. Services refer to digital GHC designed for LGBTQI+ youth for help-seeking, such as information, telecommunication, or clinical care (e.g., electronic consultation (e-consult); counselling; and access to hormone replacement therapy (HRT) (Radix et al., 2022). Interventions refer to digital strategies that have been developed to change a specific GH related behaviour or outcome for LGBTQI+ youth, such as education programmes, (e.g., to increase knowledge and understanding or decision making about GHC; Salvetti et al., 2022), including digital versions of services typically delivered in person (e.g., Shipherd et al., 2016; Blosnich et al., 2019).

### ***Exclusion***

Non-digital SRHC and GHC delivered in-person or by phone will be excluded. Where studies report on both digital and non-digital SRHC and GHC and it is not possible to disaggregate the digital from the non-digital data, these studies will be excluded. Additionally, where studies focus on the recruitment of participants (e.g., digital methods of recruitment to digital or non-digital SRHC or GHC interventions, or digital/non-digital recruitment to digital SRHC or GHC interventions), these studies will be excluded.

Studies reporting on digital care for mental health (e.g., anxiety, depression) for LGBTQI+ youth will also be excluded. While anxiety and depression are key mental health issues experienced by LGBTQI+ youth, particularly trans youth, this is distinct from gender

health, relating specifically to gender identity, expression, affirmation and transition. Gender affirmation and receiving GHC have been found to improve the mental health and wellbeing of LGBTQI+ youth, reduce anxiety, depression, and suicidal ideation and behaviour (Russell et al., 2018; Sorbara et al., 2020; Tordoff et al., 2022).

## **Context**

### ***Inclusion***

Studies from high-income and developed economy countries, as defined by the UN (2023a), will be included: Australia; Austria; Belgium; Canada; Croatia; Cyprus; Czech Republic; Denmark; Estonia; Finland; France; Germany; Greece; Hungary; Iceland; Ireland; Italy; Japan; Latvia; Lithuania; Luxembourg; Malta; Netherlands; New Zealand; Norway; Poland; Portugal; Slovakia; Slovenia; Spain; Sweden; Switzerland; United Kingdom; and United States.

While there is a move away from the terms ‘developed’ and ‘developing’ (Jimba et al., 2019), these are still the terms currently used by the UN as of 2023 (UN, 2023a, 2023b). These inclusion criteria have been applied as this scoping review is part of a wider PhD programme of formative research aiming to provide theoretically informed and evidence-based guidance for how to optimise digital SRHC and GHC for LGBTQI+ youth in the UK. Therefore, these context inclusion criteria are necessary to ensure the findings from included studies will be maximally generalisable and applicable across countries similar to the UK, with regards to access to the internet and digital technology and the provision of social policies which support access to health care (Robinson et al., 2020; Quaglio et al., 2016; UN, 2021, n.d.b; Germain et al., 2015; Gottlieb et al., 2014; OECDStatistics, 2023, 2019; International Labour Organisation [ILO], 2021, 2022; Iyer, 2021; KanchooChat, 2019; European Commission, n.d.; Azzopardi-Muscat et al., 2017; Konkov, 2017; Robles & Vargas, 2012; Arbulo et al., 2015).

### ***Exclusion***

Studies will be excluded if they were conducted in low-and-middle-income countries or countries with economies in transition and developing economies (UN, 2019). This is to ensure the studies included will be maximally generalisable and applicable across countries with similar economic and social policies to the UK, as this scoping review is part of a wider PhD programme seeking to optimise digital SRHC and GHC for LGBTQI+ youth.

### **Types of Sources**

#### ***Inclusion***

This scoping review will consider qualitative, quantitative and mixed methods studies that are classified as original research, with primary data collection. Here, quantitative research encompasses experimental and quasi-experimental study designs including randomised controlled trials, non-randomised controlled trials, before and after studies, and interrupted time-series studies. In addition, analytical observational studies including prospective and retrospective cohort studies, case-control studies, longitudinal, and analytical cross-sectional studies will be considered for inclusion. This review will also consider descriptive observational study designs including case series, individual case reports and descriptive cross-sectional studies for inclusion. Qualitative studies will include research designs such as phenomenology, grounded theory, ethnography, qualitative description, and action research. Studies using theory-based implementation and behavioural science for intervention development and evaluation will also be considered for inclusion. Pilot and feasibility studies will also be included.

#### ***Exclusion***

Reviews, conference abstracts, posters, registered reports, blogs, guidelines, text and opinion papers, letters, editorials, commentaries, protocols, preprints, and doctoral and master's theses will be excluded.

## Quality appraisal

A quality appraisal will be conducted on included papers that report on the acceptability of, or barriers or facilitators to, digital SRHC and GHC among LGBTQI+ youth using the Mixed Methods Appraisal Tool version 2018 (Hong et al., 2018). A quality appraisal is not common practice for scoping reviews, due to the nature of scoping reviews to map literature, rather than analyse data and make inferences or draw conclusions using the outcomes of studies (Peters et al., 2020). However, in this scoping review, we intend to synthesise data and comment on the levels of acceptability and the barriers and facilitators to engaging with digital SRHC and GHC, as it is not expected that sufficient literature will be identified to justify a follow up systematic review. Therefore, a quality appraisal will be performed to assess how well included studies were conducted (Higgins et al, 2019) and will be considered when summarising the evidence base and drawing conclusions.

## Methods

The proposed scoping review will be conducted in accordance with the JBI methodology for scoping reviews (Peters et al., 2020).

### Search strategy

The search strategy will aim to locate both published studies and grey literature. The PCC framework will be used to structure the searches. However, only the 'Participants' and 'Concept' inclusion criteria will be used to structure the search. 'Context' will not be included in the search strategy but will be used to screen papers for inclusion and will be included in data extraction. The search strategy was developed in three steps:

Step 1: A preliminary search of MEDLINE, the Cochrane Database of Systematic Reviews, JBI Evidence Synthesis, and BMJ Open using the words "LGBT youth sexual health", "LGBT youth STI", and "LGBT youth STD" was conducted (31.01.2023) to identify articles on the topic. An analysis of the text words contained in the title and abstract of retrieved



papers, and of the index terms used to describe the articles was conducted to develop a full search strategy, adaptable for the relevant databases/information sources. This was first developed for MEDLINE (see Appendix B). A second search using all identified key words and index terms will be undertaken across all included databases: APA PsycInfo (ProQuest); APA PsycArticles (ProQuest); CINAHL Complete (EBSCO); MEDLINE (EBSCO); ERIC (EBSCO); British Education Index (EBSCO); Education Database (ProQuest); Computer Science Database (ProQuest); and Web of Science. Five papers identified from the literature search as meeting the inclusion criteria will be used to ensure the search terms return relevant literature (Ventuneac et al., 2020; Ybarra et al., 2020; Sequeira et al., 2021; McRee et al., 2018; Bauermeister et al., 2022).

Step 2: To identify grey literature, a search using select words and phrases from the search terms – at least one from each search string (see Appendix B) – will be undertaken on Google Scholar.

Step 3: The reference list of studies identified as relevant to this review (i.e., those included) will be screened for additional sources.

### ***Inclusion***

Studies published in English and from 2018 onwards will be included, as data older than this may not be relevant in the rapidly expanding and changing field of digital SRHC and GHC (Norman et al., 2022). Furthermore, in 2018, the Scottish Government published a strategy for enhancing and transforming health and social services through delivery of health care digitally (Robinson & Johnston, 2018; Yousaf & Currie, 2021). Additionally, LGBTQI+ rights have been subject to much discussion and change over the past five years and may impact provision of and access to SRHC and GHC (McDermott et al., 2021). The date restriction of 2018 onwards will return a collection of the most up-to-date and studies, conducted in the previous five years.

### ***Exclusion***

Studies published in any language other than English will be excluded, due to lack of resources to support translation to other languages. Studies published before 2018 will also be excluded to ensure only the most up-to-date information is included in this scoping review, relevant to current global cultural and social climates (McDermott et al., 2021).

### **Study/Source of Evidence selection**

Following the searches within each database, all identified citations will be exported to excel and uploaded to Rayyan (Ouzzani et al., 2016) and duplicates removed. Rayyan was selected as this software has been found to have the best sensitivity for accurately identifying duplicates compared to Ovid multifile search, EndNote desktop, Mendeley, Zotero, and Covidence in a search of MEDLINE, Embase, Cochrane Central Register of Controlled Trials, and PsycINFO databases (McKeown & Mir, 2021).

The titles and abstracts of deduplicated studies will be screened (100% by the first author, JML, and 1% by a second reviewer, Ron O’Kane (RO)) for assessment against the eligibility criteria outlined above and categorised into one of three categories: ‘included’, where it is clear from the title and abstract that the study meets the inclusion criteria; ‘excluded’, where it is clear from the title and abstract that the study does not meet the inclusion criteria; and ‘maybe’, where it is unclear from the title and abstract if the study meets the inclusion criteria. The titles and abstracts screened by RO will be ordered from most to least relevant, using the ‘Compute Ratings’ function within Rayyan (Ouzzani et al., 2016), to prioritise the most relevant studies.

Following title and abstract screening, the full text of ‘included’ and ‘maybe’ studies will be assessed in detail against the inclusion criteria (100% by JML and 10% by RO). Reasons for exclusion of studies at each stage will be recorded and reported in the scoping review and categorised by participants (e.g., not LGBTQI+ youth), concept (e.g., not digital SRHC or

GHC), context (e.g., not a high-income, developed country), study type (e.g., not original research or intervention development/evaluation), and publication type (e.g., not a journal article). Any uncertainty that arises at each stage of the selection process will be resolved through discussion with independent experienced reviewers (authors, JMD, PF, CSE, and JG). The results of the search and the study inclusion process will be reported in full in the final scoping review and presented in a Preferred Reporting Items for Systematic Reviews and Meta-Analyses extension for Scoping Review (PRISMA-ScR) flow diagram (Tricco et al., 2018).

### **Data Extraction**

Data from final included papers will be extracted to excel (by JML) using a data extraction tool adapted (by JML, see Appendix C) from the JBI Manual for Evidence charting table for data extraction synthesis (Peters et al., 2020). Data extraction will be guided by the PCC framework and will include specific details about the study methods, participants, concept, context, and key findings relevant to the review questions. If appropriate, authors of papers will be contacted to request missing or additional data, where required. The extraction tool was piloted and refined using a relevant paper identified from the preliminary search (Magee et al., 2012).

### **Data Analysis and Presentation**

Frequency analysis of publication and study details presented in a table will provide an overview of the scope of evidence pertaining to digital SRHC and GHC for LGBTQI+ youth (aim). Data regarding each of the research questions will be charted on a table and summarised narratively (RQs). For RQ3, where acceptability has been measured qualitatively, data will be extracted verbatim then understood and evaluated using the seven component constructs outlined by Sekhon and colleagues (2017): affective attitude, burden, perceived effectiveness, ethicality, intervention coherence, opportunity costs, and self-efficacy. Where acceptability has been measured quantitatively (e.g., rating of interventions), the relevant numbers will be

detailed. Additionally, for RQ4, barriers and facilitators to LGBTQI+ youth accessing and using digital SRHC and GHC will be extracted verbatim and transformed into ‘simple statements’ that capture the essence of the barrier/facilitator.

### **Author Contributions**

Conceptualisation, JML, CSE, PF, JMD, JG; Methodology, JML, PF, JMD, CSE, JG; Writing - Original Draft, JML; Writing - Review & Editing, JML, JMD, CSE, PF, JG (Brand et al., 2015). All authors have read and agreed to the published version of the manuscript.

### **Acknowledgements**

We would like to acknowledge the contribution of Ron O’Kane (RO), a PhD student at Glasgow Caledonian University (GCU), for being the second reviewer. We would also like to acknowledge Ruth Leiser, a Research Associate at the University of Strathclyde, for peer reviewing this scoping review protocol.

### **Funding**

This scoping review is funded by a GCU (School of Health and Life Sciences) PhD scholarship awarded to the first author (JML), within the Sexual Health and Blood Borne Viruses (SHBBV) research group and the Research Centre for Health (ReaCH). Supervisors for the PhD, CSE and JMD, are supported by GCU. PF, based at the University of Strathclyde, and JG, based at University College London, are supported by their host institutions, as supervisors of the PhD.

## References

- Andrzejewski, J., Dunville, R., Johns, M. M., Michaels, S., & Reisner, S. L. (2021). Medical gender affirmation and HIV and sexually transmitted disease prevention in transgender youth: Results from the Survey of Today's Adolescent Relationships and Transitions, 2018. *LGBT Health*, 8(3), 181-189.
- Arbulo, V., Castelo, G., Oreggioni, I., Pagano, J. P. (2015). Improving Health System Efficiency Uruguay Building up the national integrated health system. *World Health Organisation*. Retrieved May 03, 2023, from <https://apps.who.int/iris/handle/10665/187934>
- Arrington-Sanders, R., Morgan, A., Oidtman, J., Qian, I., Celentano, D., & Beyrer, C. (2016). A medical care missed opportunity: preexposure prophylaxis and young black men who have sex with men. *Journal of Adolescent Health*, 59(6), 725-728.
- Arksey, H., & O'Malley, L. (2005). Scoping studies: towards a methodological framework. *International Journal of Social Research Methodology*, 8(1), 19-32.
- Atteberry-Ash, B., Walls, N. E., Kattari, S. K., Peitzmeier, S. M., Kattari, L., & Langenderfer-Magruder, L. (2020). Forced sex among youth: Accrual of risk by gender identity, sexual orientation, mental health and bullying. *Journal of LGBT Youth*, 17(2), 193-213.
- Azzopardi-Muscat, N., Buttigieg, S., Calleja, N., & Merkur, S. (2017). Malta: health system in review. *Health Systems in Transition*, 19(1), p1-136. Retrieved <https://eurohealthobservatory.who.int/publications/i/malta-health-system-review-2017>
- Bailey, J., Mann, S., Wayal, S., Hunter, R., Free, C., Abraham, C., & Murray, E. (2015). Sexual health promotion for young people delivered via digital media: a scoping review. *Public Health Research*, 3(13), 1-119.
- Bauermeister, J. A., Choi, S. K., Bruehlman-Senecal, E., Golinkoff, J., Taboada, A., Lavra, J., ... & Haritatos, J. (2022). An Identity-Affirming Web Application to Help Sexual and

- Gender Minority Youth Cope With Minority Stress: Pilot Randomized Controlled Trial. *Journal of Medical Internet Research*, 24(8), e39094.
- Bauermeister, J. A., Pingel, E. S., Jadwin-Cakmak, L., Harper, G. W., Horvath, K., Weiss, G., & Dittus, P. (2015). Acceptability and preliminary efficacy of a tailored online HIV/STI testing intervention for young men who have sex with men: the Get Connected! program. *AIDS and Behavior*, 19, 1860-1874.
- Bhatt, N., Cannella, J., & Gentile, J. P. (2022). Gender-affirming Care for Transgender Patients. *Innovations in Clinical Neuroscience*, 19(4-6), 23.
- Blosnich, J. R., Rodriguez, K. L., Hruska, K. L., Kavalieratos, D., Gordon, A. J., Matza, A., ... & Kauth, M. R. (2019). Utilization of the veterans affairs' transgender E-consultation program by health care providers: Mixed-methods study. *JMIR Medical Informatics*, 7(1), e11695.
- Boydell, N., Buston, K., & McDaid, L. M. (2017). Patterns of HIV testing practices among young gay and bisexual men living in Scotland: a qualitative study. *BMC Public Health*, 17(1), 1-10.
- Bradford, N. J., DeWitt, J., Decker, J., Berg, D. R., Spencer, K. G., & Ross, M. W. (2019). Sex education and transgender youth: 'Trust means material by and for queer and trans people'. *Sex Education*, 19(1), 84-98.
- Brady, M., Howroyd, C., Parry, G., Baraitser, P., Holdsworth, G., & Menon-Johansson, A. (2015). O2O On-line STI testing services: improving access, efficiency and user experience. *Sexually Transmitted Infections*, 91(Suppl 1), A7.
- Brand, A., Allen, L., Altman, M., Hlava, M., & Scott, J. (2015). Beyond authorship: attribution, contribution, collaboration, and credit. *Learned Publishing*, 28(2), 151-155.
- Brugha, R., Balfe, M., Conroy, R. M., Clarke, E., Fitzgerald, M., O'connell, E., ... & O'donovan, D. (2011). Young adults' preferred options for receiving chlamydia screening test

- results: a cross-sectional survey of 6085 young adults. *International Journal of STD & AIDS*, 22(11), 635-639.
- Bunger, S., de Vries, A. L., Popma, A., & Steensma, T. D. (2020). Sexual experiences of young transgender persons during and after gender-affirmative treatment. *Pediatrics*, 146(6).
- Chen, D., Hidalgo, M. A., Leibowitz, S., Leininger, J., Simons, L., Finlayson, C., & Garofalo, R. (2016). Multidisciplinary care for gender-diverse youth: A narrative review and unique model of gender-affirming care. *Transgender Health*, 1(1), 117-123
- Cherenack, E. M., Wilson, P. A., Kreuzman, A. M., Price, G. N., & Adolescent Medicine Trials Network for HIV/AIDS Interventions. (2016). The feasibility and acceptability of using technology-based daily diaries with HIV-infected young men who have sex with men: a comparison of internet and voice modalities. *AIDS and Behavior*, 20, 1744-1753.
- Coleman, E., Bockting, W., Botzer, M., Cohen-Kettenis, P., DeCuypere, G., Feldman, J., ... & Zucker, K. (2012). Standards of care for the health of transsexual, transgender, and gender-nonconforming people, version 7. *International Journal of Transgenderism*, 13(4), 165-232.
- Cui, J., Prankumar, S. K., Wong, H. T., Addo, I. Y., Tumwine, C., & Noor, M. N. (2022). Protocol for a scoping review of the use of information and communication technology platforms for the delivery and utilisation of transgender healthcare. *BMJ Open*, 12(6), e055914.
- Day, S., Smith, J., Perera, S., Jones, S., & Kinsella, R. (2021). Beyond the binary: sexual health outcomes of transgender and non-binary service users of online sexual health service. *International Journal of STD & AIDS*, 32(10), 896-902.  
<https://doi.org/10.1177/0956462420982830>

- Decker, M. J., Atyam, T. V., Zárate, C. G., Bayer, A. M., Bautista, C., & Saphir, M. (2021). Adolescents' perceived barriers to accessing sexual and reproductive health services in California: a cross-sectional survey. *BMC Health Services Research*, *21*, 1-12. <https://doi.org/10.1186/s12913-021-07278-3>
- Defreyne, J., Vander Stichele, C., Iwamoto, S. J., & T'Sjoen, G. (2022). Gender affirming hormonal therapy for transgender and gender diverse people—a narrative review. *Best Practice & Research Clinical Obstetrics & Gynaecology*, *86*. <https://doi.org/10.1016/j.bpobgyn.2022.102296>
- DeHaan, S., Kuper, L. E., Magee, J. C., Bigelow, L., & Mustanski, B. S. (2013). The interplay between online and offline explorations of identity, relationships, and sex: A mixed-methods study with LGBT youth. *Journal of Sex Research*, *50*(5), 421-434.
- Diamond, L. M. (2020). Gender fluidity and nonbinary gender identities among children and adolescents. *Child Development Perspectives*, *14*(2), 110-115.
- Eisenberg, M. E., McMorris, B. J., Rider, G. N., Gower, A. L., & Coleman, E. (2020). “It’s kind of hard to go to the doctor’s office if you’re hated there.” A call for gender-affirming care from transgender and gender diverse adolescents in the United States. *Health & Social Care in the Community*, *28*(3), 1082-1089.
- Ela, E. J., & Budnick, J. (2017). Non-heterosexuality, relationships, and young women’s contraceptive behaviour. *Demography*, *54*(3), 887-909.
- Epps, B., Markowski, M., & Cleaver, K. (2023). A rapid review and narrative synthesis of the consequences of non-inclusive sex education in UK schools on Lesbian, Gay, Bisexual, Transgender and questioning young people. *The Journal of School Nursing*, *39*(1), 87-97. <https://doi.org/10.1177/10598405211043394>
- Estcourt, C. S., Gibbs, J., Sutcliffe, L. J., Gkatzidou, V., Tickle, L., Hone, K., ... & Sonnenberg, P. (2017). The eSexual Health Clinic system for management, prevention, and control



- of sexually transmitted infections: exploratory studies in people testing for Chlamydia trachomatis. *The Lancet Public Health*, 2(4), e182-e190.
- Estcourt, C. S., Flowers, P., Cassell, J. A., Pothoulaki, M., Vojt, G., Mapp, F., ... & Mercer, C. H. (2022). Going beyond 'regular and casual': development of a classification of sexual partner types to enhance partner notification for STIs. *Sexually Transmitted Infections*, 98(2), 108-114.
- European Commission. (n.d.). *Employment, social affairs & inclusion: Your rights by country*. Retrieved May 05, 2023 from <https://ec.europa.eu/social/main.jsp?catId=858&langId=en>
- Ferreira, A., Young, T., Mathews, C., Zunza, M., & Low, N. (2013). Strategies for partner notification for sexually transmitted infections, including HIV. *Cochrane Database of Systematic Reviews*, (10).
- Fisher, C. B., Fried, A. L., Desmond, M., Macapagal, K., & Mustanski, B. (2018). Perceived barriers to HIV prevention services for transgender youth. *LGBT Health*, 5(6), 350-358.
- Flanders, C. E., Pragg, L., Dobinson, C., & Logie, C. (2017). Young sexual minority women's use of the internet and other digital technologies for sexual health information seeking. *The Canadian Journal of Human Sexuality*, 26(1), 17-25.
- Flowers, P., Lasoye, S., McQueen, J., Owusu, M. W., Symonds, M., & Estcourt, C. (2021). Developing a co-produced, systems-informed, sexually transmitted infection contact tracing intervention for gay and bisexual men who have sex with men and their 'one-off' sexual partners. *medRxiv*, 2021-07.
- Garofalo, E. M., & Garvin, H. M. (2020). The confusion between biological sex and gender and potential implications of misinterpretations. In *Sex estimation of the human skeleton* (pp. 35-52). Academic Press.

- Germain, A., Sen, G., Garcia-Moreno, C., & Shankar, M. (2015). Advancing sexual and reproductive health and rights in low-and middle-income countries: Implications for the post-2015 global development agenda. *Global Public Health, 10*(2), 137-148.
- Gilbert, M., Hottes, T. S., Kerr, T., Taylor, D., Fairley, C. K., Lester, R., ... & Ogilvie, G. (2013). Factors associated with intention to use internet-based testing for sexually transmitted infections among men who have sex with men. *Journal of Medical Internet Research, 15*(11), e254.
- Gil-Llario, M. D., Gil-Juliá, B., Giménez-García, C., Bergero-Miguel, T., & Ballester-Arnal, R. (2021). Sexual behavior and sexual health of transgender women and men before treatment: Similarities and differences. *International Journal of Transgender Health, 22*(3), 304-315.
- Gilbey, D., Morgan, H., Lin, A., & Perry, Y. (2020). Effectiveness, acceptability, and feasibility of digital health interventions for LGBTIQ+ young people: systematic review. *Journal of Medical Internet Research, 22*(12), e20158.
- Golden, M. R., Gibbs, J., Woodward, C., & Estcourt, C. S. (2022). Priorities in the implementation of partner services for HIV/STIs in high-income nations: a narrative review of evidence and recommendations. *Sexual Health, 19*(4), 309-318.  
<https://doi.org/10.1071/SH22060>
- Gottlieb, S. L., Low, N., Newman, L. M., Bolan, G., Kamb, M., & Broutet, N. (2014). Toward global prevention of sexually transmitted infections (STIs): the need for STI vaccines. *Vaccine, 32*(14), 1527-1535.
- Gruskin, S., Yadav, V., Castellanos-Usigli, A., Khizanishvili, G., & Kismödi, E. (2019). Sexual health, sexual rights and sexual pleasure: meaningfully engaging the perfect triangle. *Sexual and Reproductive Health Matters, 27*(1), 29-40.

- Guse, K., Levine, D., Martins, S., Lira, A., Gaarde, J., Westmorland, W., & Gilliam, M. (2012). Interventions using new digital media to improve adolescent sexual health: a systematic review. *Journal of Adolescent Health, 51*(6), 535-543.
- Hall, K. S., Samari, G., Garbers, S., Casey, S. E., Diallo, D. D., Orcutt, M., ... & McGovern, T. (2020). Centring sexual and reproductive health and justice in the global COVID-19 response. *The Lancet, 395*(10231), 1175-1177.
- Hibbert, M. P., Wolton, A., Weeks, H., Ross, M., Brett, C. E., Porcellato, L. A., & Hope, V. D. (2020). Psychosocial and sexual factors associated with recent sexual health clinic attendance and HIV testing among trans people in the UK. *BMJ Sexual & Reproductive Health, 46*(2), 116-125.
- Hickson, F., Tomlin, K., Hargreaves, J., Bonell, C., Reid, D., & Weatherburn, P. (2015). Internet-based cohort study of HIV testing over 1 year among men who have sex with men living in England and exposed to a social marketing intervention promoting testing. *Sexually Transmitted Infections, 91*(1), 24–30.  
<https://doi.org/10.1136/sextrans-2014-051598>
- Hidalgo, M. A., Ehrensaft, D., Tishelman, A. C., Clark, L. F., Garofalo, R., Rosenthal, S. M., ... & Olson, J. (2013). The gender affirmative model. *Human Development, 56*(5), 285-290.
- Higgins, J. P., Thomas, J., Chandler, J., Cumpston, M., Li, T., Page, M. J., & Welch, V. A. (Eds.). (2019). *Cochrane handbook for systematic reviews of interventions*. John Wiley & Sons.
- Hightow-Weidman, L. B., Pike, E., Fowler, B., Matthews, D. M., Kibe, J., McCoy, R., & Adimora, A. A. (2012). HealthMpowerment. org: feasibility and acceptability of delivering an internet intervention to young Black men who have sex with men. *AIDS Care, 24*(7), 910-920.

- Holloway, I. W., Rice, E., Gibbs, J., Winetrobe, H., Dunlap, S., & Rhoades, H. (2014). Acceptability of smartphone application-based HIV prevention among young men who have sex with men. *AIDS and Behavior*, *18*, 285-296.
- Hong, Q. N., Fàbregues, S., Bartlett, G., Boardman, F., Cargo, M., Dagenais, P., ... & Pluye, P. (2018). The Mixed Methods Appraisal Tool (MMAT) version 2018 for information professionals and researchers. *Education for Information*, *34*(4), 285-291.
- Hottes, T. S., Farrell, J., Bondyra, M., Haag, D., Shoveller, J., & Gilbert, M. (2012). Internet-based HIV and sexually transmitted infection testing in British Columbia, Canada: opinions and expectations of prospective clients. *Journal of Medical Internet Research*, *14*(2), e1948.
- Hudson-Sharp, N., & Metcalf, H. (2016). *Inequality among lesbian, gay bisexual and transgender groups in the UK: a review of evidence*. National Institute of Economic and Social Research NIESR.
- ILO. (2021). World social protection report 2020-22: Social protection at the crossroads – in pursuit of a better future. *International Labour Organization*, p 1-315. Retrieved May 05, 2023 from [https://www.ilo.org/wcmsp5/groups/public/@ed\\_protect/@soc\\_sec/documents/publication/wcms\\_817572.pdf](https://www.ilo.org/wcmsp5/groups/public/@ed_protect/@soc_sec/documents/publication/wcms_817572.pdf)
- ILO. (2022). Social protection expenditure review, Barbados. *International Labour Organization*, p 1-74. Retrieved May 05, 2023 from [https://www.ilo.org/wcmsp5/groups/public/---americas/---ro-lima/---sro-report\\_of\\_spain/documents/publication/wcms\\_858730.pdf](https://www.ilo.org/wcmsp5/groups/public/---americas/---ro-lima/---sro-report_of_spain/documents/publication/wcms_858730.pdf)
- Iyer, D. (2021). Social Protection systems and the response to COVID-19 in the Arab region. *United Nations Development Programme*, p1-52. Retrieved May 05, 2023, from

<https://www.undp.org/sites/g/files/zskgke326/files/migration/ma/Social-protectionR.pdf>

- Jackman, K. B., Dolezal, C., & Bockting, W. O. (2018). Generational differences in internalized transnegativity and psychological distress among feminine spectrum transgender people. *LGBT Health*, 5(1), 54-60.
- Jimba, M., Fujimura, M. S., & Ong, K. I. C. (2019). Developing country: an outdated term in The Lancet. *The Lancet*, 394(10202), p918.
- Jones, T. (2020). *Access to Healthcare: Understanding Disparities among LGBT & Black Communities*. Honors Theses. [https://scholarworks.wmich.edu/honors\\_theses/2620](https://scholarworks.wmich.edu/honors_theses/2620)
- Kanchoochat, V. (2019). Social protection and welfare state building: fast and slow lessons. *United Nations ESCAP*, p1-32. Retrieved May 05, 2023 from <https://repository.unescap.org/bitstream/handle/20.500.12870/1225/ESCAP-2019-WP-Social-protection-and-welfare-state-building.pdf?sequence=1&isAllowed=y>
- Kennedy, C. E., Yeh, P. T., Byrne, J., van der Merwe, L. A., Ferguson, L., Poteat, T., & Narasimhan, M. (2021). Self-administration of gender-affirming hormones. *Sexual and Reproductive Health Matters*, 29(3), 82-98.
- Kincaid, R., Estcourt, C., Frankis, J., Dalrymple, J., & Gibbs, J. (2021). Delivering HIV pre-exposure prophylaxis (PrEP) care online: A scoping review. *MedRxiv*, 2021-12.
- Knight, R. E., Shoveller, J. A., Carson, A. M., & Contreras-Whitney, J. G. (2014). Examining clinicians' experiences providing sexual health services for LGBTQ youth: considering social and structural determinants of health in clinical practice. *Health Education Research*, 29(4), 662-670.
- Konkov, A. (2017). Welfare system in contemporary Russia and its implication for Sakhalin region. *Journal of Policy Science*, 11, p37-45.

- Kuper, L. E., Lindley, L., & Lopez, X. (2019). Exploring the gender development histories of children and adolescents presenting for gender affirming medical care. *Clinical Practice in Pediatric Psychology, 7*(3), 217.
- Lacombe-Duncan, A., Logie, C. H., Persad, Y., Leblanc, G., Nation, K., Kia, H., ... & Loutfy, M. (2021). Implementation and evaluation of the ‘Transgender Education for Affirmative and Competent HIV and Healthcare (TEACHH)’ provider education pilot. *BMC Medical Education, 21*, 1-14.
- Lee, J. Y., & Rosenthal, S. M. (2023). Gender-Affirming Care of Transgender and Gender-Diverse Youth: Current Concepts. *Annual Review of Medicine, 74*.
- Lefkowitz, A. R., & Mannell, J. (2017). Sexual health service providers’ perceptions of transgender youth in England. *Health & Social Care in the Community, 25*(3), 1237-1246.
- Lelutiu-Weinberger, C., Pachankis, J. E., Gamarel, K. E., Surace, A., Golub, S. A., & Parsons, J. T. (2015). Feasibility, acceptability, and preliminary efficacy of a live-chat social media intervention to reduce HIV risk among young men who have sex with men. *AIDS and Behavior, 19*, 1214-1227.
- Ling, S. B., Richardson, D. B., Mettenbrink, C. J., Westergaard, B. C., Sapp-Jones, T. D., Crane, L. A., ... & Rietmeijer, C. A. (2010). Evaluating a web-based test results system at an urban STI clinic. *Sexually Transmitted Diseases, 37*(4), 259-263.
- Logie, C. H., Lys, C. L., Dias, L., Schott, N., Zouboules, M. R., MacNeill, N., & Mackay, K. (2019). “Automatic assumption of your gender, sexuality and sexual practices is also discrimination”: Exploring SRHC experiences and recommendations among sexually and gender diverse persons in Arctic Canada. *Health & Social Care in the Community, 27*(5), 1204-1213.

- Lorimer, K., DeAmicis, L., Dalrymple, J., Frankis, J., Jackson, L., Lorgelly, P., ... & Ross, J. (2019). A rapid review of sexual wellbeing definitions and measures: should we now include sexual wellbeing freedom?. *The Journal of Sex Research*, 56(7), 843-853.
- Lucas, R., Kahn, N., Bocek, K., Tordoff, D. M., Karrington, B., Richardson, L. P., & Sequeira, G. M. (2023). Telemedicine Utilization Among Transgender and Gender-Diverse Adolescents Before and After the COVID-19 Pandemic. *Telemedicine and e-Health*, 1-8. <https://doi.org/10.1089/tmj.2022.0382>
- Lunt, A., Llewellyn, C., Bayley, J., & Nadarzynski, T. (2021). Sexual healthcare professionals' views on the rapid provision of remote services at the beginning of COVID-19 pandemic: A mixed-methods study. *International journal of STD & AIDS*, 32(12), 1138-1148.
- Magee, J. C., Bigelow, L., DeHaan, S., & Mustanski, B. S. (2012). Sexual health information seeking online: a mixed-methods study among lesbian, gay, bisexual, and transgender young people. *Health Education & Behavior*, 39(3), 276-289.
- Maloney, K. M., Bratcher, A., Wilkerson, R., & Sullivan, P. S. (2020). Electronic and other new media technology interventions for HIV care and prevention: a systematic review. *Journal of the International AIDS Society*, 23(1), e25439.
- Marcell, A. V., Burstein, G. R., Braverman, P., Adelman, W., Alderman, E., Breuner, C., ... & Levine, D. (2017). Sexual and reproductive health care services in the pediatric setting. *Pediatrics*, 140(5).
- Martin, S. L., Young, S. K., Billings, D. L., & Bross, C. C. (2007). Health care-based interventions for women who have experienced sexual violence: A review of the literature. *Trauma, Violence, & Abuse*, 8(1), 3-18.

- McDermott, E., Nelson, R., & Weeks, H. (2021). The Politics of LGBT+ Health Inequality: Conclusions from a UK Scoping Review. *International Journal of Environmental Research and Public Health*, 18(2), 826.
- McKeown, S., & Mir, Z. M. (2021). Considerations for conducting systematic reviews: evaluating the performance of different methods for de-duplicating references. *Systematic Reviews*, 10, 1-8.
- McRee, A. L., Esber, A., & Reiter, P. L. (2015). Acceptability of home-based chlamydia and gonorrhea testing among a national sample of sexual minority young adults. *Perspectives on Sexual and Reproductive Health*, 47(1), 3-10.
- McRee, A. L., Shoben, A., Bauermeister, J. A., Katz, M. L., Paskett, E. D., & Reiter, P. L. (2018). Outsmart HPV: acceptability and short-term effects of a web-based HPV vaccination intervention for young adult gay and bisexual men. *Vaccine*, 36(52), 8158-8164.
- Mepham, N., Bouman, W. P., Arcelus, J., Hayter, M., & Wylie, K. R. (2014). People with gender dysphoria who self-prescribe cross-sex hormones: Prevalence, sources, and side effects knowledge. *The Journal of Sexual Medicine*, 11(12), 2995-3001.
- Metastasio, A., Negri, A., Martinotti, G., & Corazza, O. (2018). Transitioning bodies. The case of self-prescribing sexual hormones in gender affirmation in individuals attending psychiatric services. *Brain Sciences*, 8(5), 88.
- Miller, T. J., Wilson, S. C., Massie, J. P., Morrison, S. D., & Satterwhite, T. (2019). Breast augmentation in male-to-female transgender patients: Technical considerations and outcomes. *JPRAS Open*, 21, 63-74.
- Mimiaga, M. J., Fair, A. D., Tetu, A. M., Novak, D. S., VanDerwarker, R., Bertrand, T., ... & Mayer, K. H. (2008). Acceptability of an internet-based partner notification system for



- sexually transmitted infection exposure among men who have sex with men. *American Journal of Public Health*, 98(6), 1009-1011.
- Mitchell, K. R., Lewis, R., O'Sullivan, L. F., & Fortenberry, J. D. (2021). What is sexual wellbeing and why does it matter for public health? *The Lancet Public Health*, 6(8), e608-e613.
- Mitchell, K. J., Ybarra, M. L., Korchmaros, J. D., & Kosciw, J. G. (2014). Accessing sexual health information online: use, motivations and consequences for youth with different sexual orientations. *Health Education Research*, 29(1), 147-157.
- Mkhize, S. P., & Maharaj, P. (2020). Structural violence on the margins of society: LGBT student access to health services. *Agenda*, 34(2), 104-114.
- Monester, J., Fisher, J., Kirkman, M., Rowe, H., & Holton, S. (2019). 'If I had known the fertility health facts sooner...' Knowledge gaps as a barrier to effective fertility management: findings from the understanding fertility management in contemporary Australia survey. *The European Journal of Contraception & Reproductive Health Care*, 24(4), 274-279.
- Mustanski, B., Greene, G. J., Ryan, D., & Whitton, S. W. (2015). Feasibility, acceptability, and initial efficacy of an online sexual health promotion program for LGBT youth: the Queer Sex Ed intervention. *The Journal of Sex Research*, 52(2), 220-230.
- Newcomb, M. E., Moran, K., Li, D. H., & Mustanski, B. (2020). Demographic, regional, and political influences on the sexual health care experiences of adolescent sexual minority men. *LGBT Health*, 7(1), 28-36.
- Ng, H. H. (2016). Intersectionality and shared decision making in LGBTQ health. *LGBT health*, 3(5), 325.
- Naidoo, J., & Wills, J. (2016). *Foundations for Health Promotion-E-Book*. Elsevier Health Sciences.

- Nikkelen, S. W., & Kreukels, B. P. (2018). Sexual experiences in transgender people: the role of desire for gender-confirming interventions, psychological well-being, and body satisfaction. *Journal of Sex & Marital Therapy*, *44*(4), 370-381.
- Norman, G., Mason, T., Dumville, J. C., Bower, P., Wilson, P., & Cullum, N. (2022). Approaches to enabling rapid evaluation of innovations in health and social care: a scoping review of evidence from high-income countries. *BMJ Open*, *12*(12), e064345.
- OECDStatistics. (2023). *Sizing up Welfare States: How to OECD countries compare?* Retrieved April 20, 2023 from <https://oecdstatistics.blog/2023/02/02/sizing-up-welfare-states-how-do-oecd-countries-compare/>
- OECDStatistics. (2019). *Social Expenditure – Aggregated Data*. Retrieved April 20, 2023 from [https://stats.oecd.org/Index.aspx?DataSetCode=SOCX\\_AGG](https://stats.oecd.org/Index.aspx?DataSetCode=SOCX_AGG)
- O’Neill, J., Tabish, H., Welch, V., Petticrew, M., Pottie, K., Clarke, M., ... & Tugwell, P. (2014). Applying an equity lens to interventions: using PROGRESS ensures consideration of socially stratifying factors to illuminate inequities in health. *Journal of Clinical Epidemiology*, *67*(1), 56-64.
- Ong, J. J., Estcourt, C., Tucker, J. D., Golden, M. R., Hocking, J. S., & Fairley, C. K. (2022). How should we deliver sexual health services in the 2020s? *Sexual Health*, *19*(4), 233-235.
- Ortiz-Martínez, Y., & Ríos-González, C. M. (2017). Need for more research on and health interventions for transgender people. *Sexual Health*, *14*(2), 196-197.
- Ouzzani, M., Hammady, H., Fedorowicz, Z., & Elmagarmid, A. (2016). Rayyan — a web and mobile app for systematic reviews. *Systematic Reviews*, *5*(210). <http://doi.org/10.1186/s13643-016-0384-4>
- Pérez, R. B., Reid, D., Maxwell, K. J., Gibbs, J., Dema, E., Bonell, C., ... & Mitchell, K. R. (2023). Access to and quality of sexual and reproductive health services in Britain

- during the early stages of the COVID-19 pandemic: a qualitative interview study of patient experiences. *BMJ Sexual & Reproductive Health*, 49(1), 12-20.
- Perovic, B. (2016). *Defining youth in contemporary national legal and policy frameworks across Europe*. Partnership between the European Commission and the Council of Europe in the field of youth. Accessed February 24, 2023 from <https://pjp-eu.coe.int/documents/42128013/47261653/Analytical+paper+Youth+Age+Bojana+Perovic+4.4.16.pdf/eb59c5e2-45d8-4e70-b672-f8de0a5ca08c>
- Peters, M. D., Godfrey, C. M., Khalil, H., McInerney, P., Parker, D., & Soares, C. B. (2015). Guidance for conducting systematic scoping reviews. *JBIM Evidence Implementation*, 13(3), 141-146.
- Peters M. D. J., Godfrey, C., McInerney, P., Munn, Z., Tricco, C. C., & Khalil, H. (2020). In Aromataris, E. & Munn, Z. (Eds) *JBIM Manual for Evidence Synthesis*, JBIM. Available from <https://synthesismanual.jbi.global>. <https://doi.org/10.46658/JBIMES-20-12>
- Phillips, G., Neray, B., Janulis, P., Felt, D., Mustanski, B., & Birkett, M. (2019). Utilization and avoidance of sexual health services and providers by YMSM and transgender youth assigned male at birth in Chicago. *AIDS Care*, 31(10), 1282-1289.
- Puckett, J. A., Cleary, P., Rossman, K., Mustanski, B., & Newcomb, M. E. (2018). Barriers to gender-affirming care for transgender and gender nonconforming individuals. *Sexuality Research and Social Policy*, 15, 48-59.
- Quaglio, G., Dario, C., Karapiperis, T., Delponte, L., McCormack, S., Tomson, G., ... & Zanaboni, P. (2016). Information and communications technologies in low and middle-income countries: Survey results on economic development and health. *Health Policy and Technology*, 5(4), 318-329.
- Quinn, K., Bowleg, L., & Dickson-Gomez, J. (2019). "The fear of being Black plus the fear of being gay": The effects of intersectional stigma on PrEP use among young Black gay,

- bisexual, and other men who have sex with men. *Social Science & Medicine*, 232, 86-93.
- Quinn, G. P., Tishelman, A. C., Chen, D., & Nahata, L. (2021). Reproductive health risks and clinician practices with gender diverse adolescents and young adults. *Andrology*, 9(6), 1689-1697. <https://doi.org/10.1111/andr.13026>
- Radix, A. E., Bond, K., Carneiro, P. B., & Restar, A. (2022). Transgender Individuals and Digital Health. *Current HIV/AIDS Reports*, 1-8.
- Reisner, S. L., Jadwin-Cakmak, L., Sava, L., Liu, S., & Harper, G. W. (2019). Situated vulnerabilities, sexual risk, and sexually transmitted infections' diagnoses in a sample of transgender youth in the United States. *AIDS Patient Care and STDs*, 33(3), 120-130.
- Refugio, O. N., Kimble, M. M., Silva, C. L., Lykens, J. E., Bannister, C., & Klausner, J. D. (2019). Brief report: PrEPTECH: a telehealth-based initiation program for HIV pre-exposure prophylaxis in young men of color who have sex with men. A pilot study of feasibility. *JAIDS Journal of Acquired Immune Deficiency Syndromes*, 80(1), 40-45.
- Robinson, L., Schulz, J., Blank, G., Ragnedda, M., Ono, H., Hogan, B., ... & Khilnani, A. (2020). Digital inequalities 2.0: Legacy inequalities in the information age. *First Monday*, 25(7).
- Robinson, S. & Johnston, P. (2018). SCOTLAND'S DIGITAL HEALTH & CARE STRATEGY: Enabling, connecting & empowering. The Scottish Government. Accessed August 07, 2023 from <https://www.gov.scot/binaries/content/documents/govscot/publications/strategy-plan/2018/04/scotlands-digital-health-care-strategy-enabling-connecting-empowering/documents/00534657-pdf/00534657-pdf/govscot%3Adocument/00534657.pdf>

- Robles, C., & Vargas, L. H. (2012). *Social protection systems in Latin America and the Caribbean: Trinidad and Tobago*. United Nations ECLAC. Retrieved May 05, 2023 from [https://repositorio.cepal.org/bitstream/handle/11362/4039/S1201017\\_en.pdf](https://repositorio.cepal.org/bitstream/handle/11362/4039/S1201017_en.pdf)
- Rotondi, N. K., Bauer, G. R., Scanlon, K., Kaay, M., Travers, R., & Travers, A. (2013). Nonprescribed hormone use and self-performed surgeries: “do-it-yourself” transitions in transgender communities in Ontario, Canada. *American Journal of Public Health, 103*(10), 1830-1836.
- Russell, S. T., Pollitt, A. M., Li, G., & Grossman, A. H. (2018). Chosen name use is linked to reduced depressive symptoms, suicidal ideation, and suicidal behavior among transgender youth. *Journal of Adolescent Health, 63*(4), 503-505.
- Saewyc, E. M. (2014). Adolescent pregnancy among lesbian, gay, and bisexual teens. *International Handbook of Adolescent Pregnancy: Medical, Psychosocial, and Public Health Responses*, 159-169.
- Salvetti, B. M. (2022). *Impact of a Web-based Decision Aid for Gender Affirming Treatment*. Doctoral Thesis. University of California, Los Angeles.
- Schein, A. I., Coleman, T., Lachowsky, N., & Bauer, G. R. (2021). Health care access among transgender and nonbinary people in Canada, 2019: a cross-sectional survey. *Canadian Medical Association Open Access Journal, 9*(4), E1213-E1222.
- Sekhon, M., Cartwright, M., & Francis, J. J. (2017). Acceptability of healthcare interventions: an overview of reviews and development of a theoretical framework. *BMC Health Services Research, 17*(1), 1-13.
- Semprevivo, L. K. (2021). Dating and sexual violence victimization among lesbian, gay, bisexual, and questioning youth: Considering the importance of gender and sexual orientation. *Journal of Aggression, Maltreatment & Trauma, 30*(5), 662-678.

- Sequeira, G. M., Kidd, K. M., Coulter, R. W., Miller, E., Fortenberry, D., Garofalo, R., ... & Ray, K. N. (2021). Transgender youths' perspectives on telehealth for delivery of Gender-Affirming care. *Journal of Adolescent Health, 68*(6), 1207-1210.
- Sequeira, G. M., Kidd, K. M., Coulter, R. W., Miller, E., Garofalo, R., & Ray, K. N. (2020). Affirming transgender youths' names and pronouns in the electronic medical record. *JAMA Pediatrics, 174*(5), 501-503.
- Shanshan, Y. (2014). *Through an intersectionality lens: service provider views on the sexual health needs of racialized LGBTQ youth in Toronto*. Theses and Dissertations (Comprehensive). 1643. Retrieved February 27, 2023, from <https://scholars.wlu.ca/etd/1643>
- Sharma, A., Kahle, E., Todd, K., Peitzmeier, S., & Stephenson, R. (2019). Variations in testing for HIV and other sexually transmitted infections across gender identity among transgender youth. *Transgender Health, 4*(1), 46-57.
- Shpherd, J. C., Kauth, M. R., & Matza, A. (2016). Nationwide interdisciplinary e-consultation on transgender care in the Veterans Health Administration. *Telemedicine and e-Health, 22*(12), 1008-1012.
- Skeen, S. J., & Cain, D. (2022). mHealth for transgender and gender-expansive youth: an update on COVID, venture capital, and the cultural in/congruence of revenue-driven sustainability models. *mHealth, 8*.
- Sorbara, J. C., Chiniara, L. N., Thompson, S., & Palmert, M. R. (2020). Mental health and timing of gender-affirming care. *Pediatrics, 146*(4).
- Sood, R., Chen, D., Muldoon, A. L., Chen, L., Kwasny, M. J., Simons, L. K., ... & Jordan, S. W. (2021). Association of chest dysphoria with anxiety and depression in transmasculine and nonbinary adolescents seeking gender-affirming care. *Journal of Adolescent Health, 68*(6), 1135-1141.

- Step, M. M., Smith, J. M., Lewis, S. A., & Avery, A. K. (2022). Using the positive peers mobile app to improve clinical outcomes for young people with HIV: Prospective observational cohort comparison. *JMIR mHealth and uHealth*, *10*(9), e37868.
- Stephenson, R., Todd, K., Kahle, E., Sullivan, S. P., Miller-Perusse, M., Sharma, A., & Horvath, K. J. (2020). Project Moxie: results of a feasibility study of a telehealth intervention to increase HIV testing among binary and nonbinary transgender youth. *AIDS and Behavior*, *24*, 1517-1530.
- Sterling, J., & Garcia, M. M. (2020). Fertility preservation options for transgender individuals. *Translational Andrology and Urology*, *9*(Suppl 2), S215.
- Stoehr, J. R., Hamidian Jahromi, A., Hunter, E. L., & Schechter, L. S. (2022). Telemedicine for gender-affirming medical and surgical care: A systematic review and call-to-action. *Transgender Health*, *7*(2), 117-126.
- Stonewall. (n.d.). *List of LGBTQIA+ terms*. Retrieved February 17, 2023 from <https://www.stonewall.org.uk/list-lgbtq-terms>
- Tan, K. K., Byrne, J. L., Treharne, G. J., & Veale, J. F. (2022). Unmet need for gender-affirming care as a social determinant of mental health inequities for transgender youth in Aotearoa/New Zealand. *Journal of Public Health*, fdac131, P1-9.
- Tanner, A. E., Mann, L., Song, E., Alonzo, J., Schafer, K., Arellano, E., ... & Rhodes, S. D. (2016). weCARE: A social media-based intervention designed to increase HIV care linkage, retention, and health outcomes for racially and ethnically diverse young MSM. *AIDS Education and Prevention*, *28*(3), 216-230.
- Tordoff, D. M., Wanta, J. W., Collin, A., Stepney, C., Inwards-Breland, D. J., & Ahrens, K. (2022). Mental health outcomes in transgender and nonbinary youths receiving gender-affirming care. *JAMA Network Open*, *5*(2), e220978-e220978.

- Tornello, S. L., Riskind, R. G., & Patterson, C. J. (2014). Sexual orientation and sexual and reproductive health among adolescent young women in the United States. *Journal of Adolescent Health, 54*(2), 160-168.
- Tricco, A. C., Lillie, E., Zarin, W., O'Brien, K. K., Colquhoun, H., Levac, D., ... & Straus, S. E. (2018). PRISMA extension for scoping reviews (PRISMA-ScR): checklist and explanation. *Annals of Internal Medicine, 169*(7), 467-473.
- Tucker, J. D., Hocking, J., Oladele, D., & Estcourt, C. (2022). Digital sexually transmitted infection and HIV services across prevention and care continuums: evidence and practical resources. *Sexual Health, 19*(4). <https://doi.org/10.1071/SH22023>
- UKHSA. (2022). *National STI surveillance data 2021: Table 2*. Retrieved February 17, 2023 from <https://www.gov.uk/government/statistics/sexually-transmitted-infections-stis-annual-data-tables>
- UN. (n.d.a). *Youth*. Retrieved April 18, 2023 from <https://www.un.org/en/global-issues/youth>
- UN. (n.d.b). *Welfare state. United Nations ESCWA*. Retrieved May 05, 2023 from <https://archive.unescwa.org/welfare-state>
- UN. (n.d.c). *Resolutions of sexual orientation, gender identity and sex characteristics: OHCHR and the human rights of LGBTI people. United Nations Human Rights Office of the high commissioner*. Retrieved May 03, 2023 from <https://www.ohchr.org/en/sexual-orientation-and-gender-identity/resolutions-sexual-orientation-gender-identity-and-sex-characteristics>
- UN. (2011). *Follow-up and implementation of the Vienna Declaration and Programme of Action*. Retrieved April 18, 2023 from <http://arc-international.net/wp-content/uploads/2011/08/HRC-Res-17-191.pdf>



- UN. (2021). *Least developed countries suffer digital divide in mobile connectivity*. Retrieved August 16th, 2023, from <https://unctad.org/topic/least-developed-countries/chart-april-2021>
- UN. (2023a). World Economic Situation and Prospects. *United Nations*, p1-43. Retrieved May 09, 2023, from <https://desapublications.un.org/publications/world-economic-situation-and-prospects-2023>
- UN. (2023b). UN Documentation: Development. Retrieved August 25, 2023, from <https://research.un.org/en/docs/dev/2016-2030>
- UN. (2019). World Economic Situation and Prospects. *United Nations*. Retrieved May 09, 2023 from [https://www.un.org/development/desa/dpad/wp-content/uploads/sites/45/WESP2019\\_BOOK-ANNEX-en.pdf](https://www.un.org/development/desa/dpad/wp-content/uploads/sites/45/WESP2019_BOOK-ANNEX-en.pdf)
- van de Grift, T. C. (2023). Masculinizing and defeminizing gender-affirming surgery. *Best Practice & Research Clinical Obstetrics & Gynaecology*, 102323.
- Ventuneac, A., Li, D. H., Mongrella, M. C., Moskowitz, D. A., Weingardt, K. R., Brown, C. H., ... & Mustanski, B. (2020). Exploring potential implementation barriers and facilitators of the SMART program: a stepped-care package of ehealth HIV prevention interventions for adolescent men who have sex with men. *Sexuality Research and Social Policy*, 17, 378-388.
- West, R., Okecha, E., & Forbes, K. (2015). Keeping, “app” to date: Using geolocation apps to signpost to local sexual health services. *Sexually Transmitted Infections*, 91, A32–A33. <http://doi.org/10.1136/sextrans-2015-052126.96>
- WHO. (2023). *Adolescent Health*. Retrieved April 23, 2023, from <https://www.who.int/southeastasia/health-topics/adolescent-health>

- WHO. (2006). *Defining sexual health: report of a technical consultation on sexual health, 28–31 January 2002*. Geneva, World Health Organization. Retrieved January 17, 2023, from <http://www.who.int/reproductive-health/publications/sexualhealth/index.html>.
- WHO. (2022). *Sexually transmitted infections (STIs)*. Retrieved April 23, 2023, from [https://www.who.int/news-room/fact-sheets/detail/sexually-transmitted-infections-\(stis\)](https://www.who.int/news-room/fact-sheets/detail/sexually-transmitted-infections-(stis))
- WHO. (2017). *World Bank and WHO: Half the world lacks access to essential health services, 100 million still pushed into extreme poverty because of health expenses*. Retrieved May 12, 2023 from <https://www.who.int/news/item/13-12-2017-world-bank-and-who-half-the-world-lacks-access-to-essential-health-services-100-million-still-pushed-into-extreme-poverty-because-of-health-expenses>
- Wood, S. M., Salas-Humara, C., & Dowshen, N. L. (2016). Human immunodeficiency virus, other sexually transmitted infections, and sexual and reproductive health in lesbian, gay, bisexual, transgender youth. *Pediatric Clinics*, 63(6), 1027-1055.
- Wright, T., Nicholls, E. J., Rodger, A. J., Burns, F. M., Weatherburn, P., Pebody, R., ... & Witzel, T. C. (2021). Accessing and utilising gender-affirming healthcare in England and Wales: trans and non-binary people's accounts of navigating gender identity clinics. *BMC Health Services Research*, 21, 1-11.
- Ybarra, M. L., Goodman, K. L., Saewyc, E., Scheer, J. R., & Stroem, I. F. (2022). Youth characteristics associated with sexual violence perpetration among transgender boys and girls, cisgender boys and girls, and nonbinary youth. *JAMA Network Open*, 5(6), e2215863-e2215863.
- Ybarra, M. L., Price-Feeney, M., Prescott, T., Goodenow, C., Saewyc, E., & Rosario, M. (2020). Girl2Girl: How to develop a salient pregnancy prevention program for cisgender sexual minority adolescent girls. *Journal of Adolescence*, 85, 41-58.

YoungScot. (2022). Gender Identity Terms. Retrieved February 17, 2023, from <https://young.scot/get-informed/gender-identity-terms>

Yousaf, H. & Currie, S. (2021). Enabling, Connecting and Empowering: Care in the Digital Age. *The Scottish Government*. Accessed August 08, 2023, from <https://www.gov.scot/binaries/content/documents/govscot/publications/strategy-plan/2021/10/scotlands-digital-health-care-strategy/documents/enabling-connecting-empowering-care-digital-age/enabling-connecting-empowering-care-digital-age/govscot%3Adocument>

Zaneva, M., Philpott, A., Singh, A., Larsson, G., & Gonsalves, L. (2022). What is the added value of incorporating pleasure in sexual health interventions? A systematic review and meta-analysis. *Plos One*, 17(2), e0261034.

## Appendices

### Appendix A

*Differences between this current scoping review and similar studies identified*

| <b>Similar study</b>                                                                                                                                                   | <b>Details of similar study</b>                                                                                                                                               | <b>Details of current study</b>                                                                                                                                                                                                                                                  | <b>Key differences between studies found and this current scoping review and</b>                                                                                                                                                                                                                                                                                         |
|------------------------------------------------------------------------------------------------------------------------------------------------------------------------|-------------------------------------------------------------------------------------------------------------------------------------------------------------------------------|----------------------------------------------------------------------------------------------------------------------------------------------------------------------------------------------------------------------------------------------------------------------------------|--------------------------------------------------------------------------------------------------------------------------------------------------------------------------------------------------------------------------------------------------------------------------------------------------------------------------------------------------------------------------|
| Gilbey et al. (2020)<br><br><i>Systematic review exploring effectiveness, acceptability, and feasibility of digital health interventions for LGBTQI+ young people.</i> | Concept:<br>Search included drug use, smoking, mental health, and sexual health.<br>Search included only digital interventions intended to effect change in a health outcome. | Concept:<br>Search will include sexual and reproductive health and gender health.<br>Search will include a broad range of digital services/interventions, including acceptability of and barriers and facilitators to engaging with digital services (see Eligibility criteria). | Only one sexual health paper was included in the systematic review. This study will return and report results on sexual health and gender care, rather than drug use, smoking, mental health and sexual health. This study will also return and report on a considerably wider variety of types of digital health care and concepts of engagement with digital services. |
|                                                                                                                                                                        | Dates of studies included:<br>Included studies from 2001 onward (2001-2020)                                                                                                   | Dates of studies included:<br>Including studies from 2018 onward (2018-2023) as data older than this may not be relevant in the rapidly expanding and changing field of digital SRHC.                                                                                            | This study will return and report results from more recent research.                                                                                                                                                                                                                                                                                                     |
| Cui et al., (2022)<br><br><i>Protocol for a scoping review of research regarding digital provision of transgender health services.</i>                                 | Participants:<br>Search included papers with transgender participants only.<br>No age limit specified.                                                                        | Participants:<br>Search will include inclusive 'LGBTQI+' terms (see Appendix B).<br>Search will include papers with only 'youth' participants (aged 10-35).                                                                                                                      | This study will return and report results on LGBTQ+ youth, specifically, rather than all and only transgender people.                                                                                                                                                                                                                                                    |

|                                                                                                             |                                                                                                                                                                                                                                                 |                                                                                                                                                                                                                                                                                                                                                               |                                                                                                                              |
|-------------------------------------------------------------------------------------------------------------|-------------------------------------------------------------------------------------------------------------------------------------------------------------------------------------------------------------------------------------------------|---------------------------------------------------------------------------------------------------------------------------------------------------------------------------------------------------------------------------------------------------------------------------------------------------------------------------------------------------------------|------------------------------------------------------------------------------------------------------------------------------|
|                                                                                                             | <p>Search sources:<br/>Published literature – 3 databases were searched (Scopus, CINHAL, PubMed).<br/>Grey literature – searches included theses, book chapters and conference proceedings, which will be excluded from the current review.</p> | <p>Search sources:<br/>Published literature - 9 databases will be searched including health, psychology, education, and computer science databases (see search strategy in Methods).<br/>For grey literature, included theses, book chapters and conference proceedings, which will be excluded from the current review (see search strategy in Methods).</p> | <p>This study will return and report results on from considerably different search sources.</p>                              |
|                                                                                                             | <p>Dates of studies included:<br/>No date restriction, included all studies published until 2022.</p>                                                                                                                                           | <p>Dates of studies included:<br/>Including studies from 2018-2023, as data older than this may not be relevant in the rapidly expanding and changing field of digital SRHC</p>                                                                                                                                                                               | <p>This study will return a collection of only recent research.</p>                                                          |
| <p>Stoehr et al. (2022)<br/><i>A systematic review regarding telemedicine for gender-affirming care</i></p> | <p>Participants:<br/>Search included papers with transgender participants only.<br/>No age limit identified.</p>                                                                                                                                | <p>Participants:<br/>Search will include inclusive ‘LGBTQI+’ terms (see Appendix B).<br/>Search will include studies with only ‘youth’ participants (aged 10-35).</p>                                                                                                                                                                                         | <p>This study will return and report results on LGBTQ+ youth, specifically, rather than all and only transgender people.</p> |
|                                                                                                             | <p>Concept:<br/>Search included only four terms for digital health care, “telehealth” “telemedicine” “teleconsultation” “telecommunication</p>                                                                                                  | <p>Concept:<br/>Search will include thirty broad terms for digital health care, e.g., “smartphone”, “eHealth” and “internet intervention” (see Appendix B).</p>                                                                                                                                                                                               | <p>This study will return and report results on a considerably wider variety of types of digital health care.</p>            |

---

|                                                                     |                                                                                                                      |                                                                                     |
|---------------------------------------------------------------------|----------------------------------------------------------------------------------------------------------------------|-------------------------------------------------------------------------------------|
| Search sources:<br>Searched three databases and no grey literature. | Search sources:<br>Will search nine databases and three sources of grey literature (see search strategy in Methods). | This study will return and report results on from considerably more search sources. |
|---------------------------------------------------------------------|----------------------------------------------------------------------------------------------------------------------|-------------------------------------------------------------------------------------|

---

## Appendix B

### *Search terms generated for MEDLINE (EBSCO)*

| <b>Search string</b>                   | <b>Search terms</b>                                                                                                                                                                                                                                                                                                                                                                                                                                                                                                                                                                                                                                                                                                                                                                                                                                                                                                                                                                                                                                                                                                                                                                                                                                 |
|----------------------------------------|-----------------------------------------------------------------------------------------------------------------------------------------------------------------------------------------------------------------------------------------------------------------------------------------------------------------------------------------------------------------------------------------------------------------------------------------------------------------------------------------------------------------------------------------------------------------------------------------------------------------------------------------------------------------------------------------------------------------------------------------------------------------------------------------------------------------------------------------------------------------------------------------------------------------------------------------------------------------------------------------------------------------------------------------------------------------------------------------------------------------------------------------------------------------------------------------------------------------------------------------------------|
| Sexual orientation/<br>gender minority | LGB* OR Lesbian OR Gay OR Bisexual OR lesbians OR gays OR bisexuals OR homosexual OR homosexuals OR Trans OR Transgender OR Transexual OR Transsexual OR “Trans men” OR “Trans women” OR “Trans man” OR “Trans woman” OR Queer OR Questioning OR Intersex OR Asexual OR Aromantic OR Pansexual OR “Men who have sex with men” OR MSM OR “Women who have sex with women” OR WMW OR “Women who have sex with women and men” OR WSWM OR “Women who have sex with men and women” OR WSMW OR “Men who have sex with men and women” OR MSMW OR “Men who have sex with women and men” OR MSWM OR “Gay and bisexual men who have sex with men” OR GBMSM OR Non-binary OR Nonbinary OR “Non binary” OR “Gender non-conforming” OR “Sexual* minority” OR “Sexual identity minority” OR “Sexual orientation minority” OR “sexual* minorities” OR “sexual orientation minorities” OR “sexual identity minorities” OR “sexual-identity minorities” OR “sexual-orientation minorities” OR “sexual* minority” OR “sexual-identity minority” OR “sexual-orientation minority” OR “gender minorities” OR “Gender minority” OR Same-sex OR “same sex” OR Non-heterosexual OR Nonheterosexual OR Non-cisgender OR Noncisgender OR “Gender diverse” OR “Gender-diverse” |
| Age                                    | Youth OR “Young people” OR “Young adult*” OR “Young-adult” OR “Young person*” OR “Young-person” OR Teen* OR Adolescent* OR “Young MSM” OR “Young GBMSM” OR YMSM OR YBMSM OR young                                                                                                                                                                                                                                                                                                                                                                                                                                                                                                                                                                                                                                                                                                                                                                                                                                                                                                                                                                                                                                                                   |
| Digital                                | Mobile-based OR Mobile-application OR Mobile-App OR “Mobile based” OR “Mobile application” OR “Mobile app” OR Website OR Web-based OR Web-application OR Web-app OR “Web based” OR “Web application” OR “Web app” OR Digital OR “Digital Health” OR eHealth OR mHealth OR Smartphone OR Telehealth OR Telemedicine OR Telecommunication OR “Tele communication” OR “Tele health” OR “Tele medicine” OR “Tele care” OR “Technology Enabled Care Services” OR “TECS” OR “Artificial Intelligence” OR AI OR Artificial-intelligence OR online OR internet OR “Mobile health” OR “electronic health” OR “live chat” OR “video chat” OR “video consultation” OR eConsult OR econsultation OR “internet intervention”                                                                                                                                                                                                                                                                                                                                                                                                                                                                                                                                     |
| Type of health care                    | “Sexual health” OR “Sexual health care” OR “Sexual healthcare” OR “Sexual and reproductive health” OR “Sexual and reproductive health care” OR “Sexual and reproductive healthcare” OR “Reproductive health” OR “Reproductive health care” OR “Reproductive healthcare” OR STI OR “Sexually transmitted infection” OR STD OR “Sexually transmitted disease” OR HIV OR “Human immunodeficiency virus” OR Chlamydia OR Gonorrh* OR Syphilis OR Herpes OR Hepatitis OR “Bacterial vaginosis” OR “Human papilloma virus” OR “Human papillomavirus” OR HPV OR “Genital warts” OR “condyloma acuminatum” OR Fertility “Pregnancy management” OR “Pregnancy                                                                                                                                                                                                                                                                                                                                                                                                                                                                                                                                                                                                |

---

prevention” OR “Pregnancy termination” OR “Pregnancy assistance” OR “Fertility management” OR “Fertility assistance” OR “Fertility preservation” OR “Sexual wellbeing” OR “Sexual well-being” OR “Sexual pleasure” OR “Sexual violence” OR “Sexual abuse” OR “Sexual harassment” OR Gender OR “Gender identity” OR “Gender expression” OR “Gender transition” OR Transition OR “Social transition” OR “Medical transition” OR “Physical transition” OR “Cross sex” OR “gender dysphoria” OR “Partner notification” OR “Partner notification and management” OR “Contact tracing” OR “Pre-exposure prophylax\*” OR PrEP OR “Post-exposure prophylax\*” OR Contraception OR Condom OR Femidom OR “Dental dam” OR “In vitro fertilisation” OR “In uterine insemination” OR IVF OR IUI OR “Gender affirming” OR “Gender-affirming” OR “Gender reaffirming” OR “Hormone replacement” OR “HRT” OR “Hormone block\*” OR “Puberty block\*” OR “feminizing hormone” OR “masculinizing hormone” OR “feminising hormone” OR “masculinising hormone” OR “hormone treatment” OR “hormone therapy” OR “testosterone therapy” OR “STI care” OR “HIV care” OR “Sexual health Service” OR “sexual healthcare service” OR “sexual health care service” OR “Sexual health and reproduction Service” OR "STI Intervention" OR "HIV intervention" OR "sexual health intervention" OR "STI Prevention" OR "HIV prevention" OR "sexual respect" OR "sexual health education" OR "sexual health Information" OR "sexual health promotion" OR "STI Testing" OR "HIV testing" OR "STI self-sampling" OR "HIV self-sampling" OR “HIV self-test” OR “HIV-self-testing” OR "STI treatment" OR "HIV treatment" OR "STI test results" OR "HIV test result" OR "HIV test results" OR "HIV management" OR "STI screening" OR "HIV screening" OR "sexual health Assistance" OR "sexual health advice" OR "sexual health Support" OR "sexual health Counselling" OR "sexual health Therapy" OR "sexual and reproductive health intervention" OR "sexual health and reproduction education" OR "sexual health and reproduction Information" OR "sexual health and reproduction promotion" OR "sexual health and reproduction assistance" OR "sexual health and reproduction advice" OR "sexual health and reproduction Support" OR "sexual health and reproduction Counselling" OR "sexual health and reproduction Therapy" OR "HIV counselling" OR "HIV therapy" OR "HIV support" OR "HIV advice" OR "Gender health" OR "gender affirming therapy" OR "gender affirming support" OR "gender affirming advice" OR "Gender affirming care advice" OR "gender affirming care support" OR "gender health support" OR "gender health advice" OR “AIDS” OR “HIV/AIDS” OR “HIV/STI” OR “STI/HIV” OR “STIs/HIV” OR “HIV/STIs”

---

|          |                                                  |
|----------|--------------------------------------------------|
| Limiters | Source type: Scholarly article/Academic journals |
|          | Document type: Articles                          |
|          | Language: English                                |
|          | Date: from 2018                                  |

---

*Note.* All terms were searched title/abstract/keywords. All search strings were combined with AND.



## Appendix C

### *Data to be extracted for scoping review*

| <b>Component</b>    | <b>Data to be extracted</b>                                                                                                                                                                                                                                                                                                                                                                                                                                                                                                                                                                                                                                                                                                                                                                                                                                                                                                                                                                                                                                                                                                                             |
|---------------------|---------------------------------------------------------------------------------------------------------------------------------------------------------------------------------------------------------------------------------------------------------------------------------------------------------------------------------------------------------------------------------------------------------------------------------------------------------------------------------------------------------------------------------------------------------------------------------------------------------------------------------------------------------------------------------------------------------------------------------------------------------------------------------------------------------------------------------------------------------------------------------------------------------------------------------------------------------------------------------------------------------------------------------------------------------------------------------------------------------------------------------------------------------|
| Publication details | <ul style="list-style-type: none"> <li>• Study author</li> <li>• Study year</li> </ul>                                                                                                                                                                                                                                                                                                                                                                                                                                                                                                                                                                                                                                                                                                                                                                                                                                                                                                                                                                                                                                                                  |
| Study details       | <ul style="list-style-type: none"> <li>• Study design</li> <li>• Sample size</li> <li>• Sampling type</li> <li>• Study funding</li> </ul>                                                                                                                                                                                                                                                                                                                                                                                                                                                                                                                                                                                                                                                                                                                                                                                                                                                                                                                                                                                                               |
| Participants        | <ul style="list-style-type: none"> <li>• LGBTQI+: gender and sexual orientation</li> <li>• Age: Age group identifying word used (e.g., ‘youth’); age range; and any age-related guidelines used (e.g., WHO, 2023)</li> <li>• Intersectionality: Guided by the PROGRESS+ criteria (O’Neill et al., 2014): place of residence; race/ ethnicity/ culture/ language; occupation; religion; education; socio-economic status; social capital; personal characteristics associated with discrimination (e.g., disability: mental health illness or disorder; physical disability; learning difficulty); and features of relationships (relationship type; Estcourt et al., 2022)</li> </ul>                                                                                                                                                                                                                                                                                                                                                                                                                                                                   |
| Concept             | <ul style="list-style-type: none"> <li>• The type of SRHC and GHC dimension (e.g., STI/HIV prevention, testing, treatment, or management; fertility prevention, assistance, termination, or preservation; sexual violence; sexual wellbeing; gender identity, expression, or transition)</li> <li>• Theories used to describe, explain and understand SRHC and its implementation, including behaviour change frameworks and implementation science, such as the Behaviour Change Wheel (Michie et al., 2014); or Normalisation Process Theory (Murray et al., 2010)</li> <li>• The focus of each study in relation to SRHC and GHC, e.g., the design/ development of; provision/ delivery of; engagement with; access to; perceptions/ views of; outcomes of; acceptability of; barriers/ challenges/ drawbacks; facilitators/ benefits/ enablers; effectiveness of; feasibility of.</li> <li>• Whether the study was of an intervention or a service</li> <li>• The method of digital technology (e.g., website or app)</li> <li>• Key findings (e.g., type/levels of acceptability; barriers and facilitators will be extracted verbatim)</li> </ul> |
| Context             | <ul style="list-style-type: none"> <li>• The country of where data collection occurred</li> <li>• The year the data was collected</li> </ul>                                                                                                                                                                                                                                                                                                                                                                                                                                                                                                                                                                                                                                                                                                                                                                                                                                                                                                                                                                                                            |

*Note.* Where a study has not reported a data point, this will be extracted as N/R (not reported). Where there is lack of clarity in the study regarding one of the data extraction points, this will be extracted as ‘Unclear’.
